# Supplementary material
Source: publisher figshare collection journal article supplement (https://karger.figshare.com/articles/dataset/_/7593068)
Supplement: Supplementary file 1 [file 1]

Archive with 3 entries (3 files):
- 495310sm_2.pdf
- 495310sm_1.pdf
- 495310sm_3.pdf
