# Supplementary material
Source: publisher figshare collection journal article supplement (https://karger.figshare.com/articles/dataset/_/7593068)
Supplement: Supplementary file 1 [file 1 › 495310sm_1.pdf]

## Supplemental Table

**Table S1. Reagents and Antibodies.**

| Reagents or Antibodies                     | concentration | catalogue      | Manufacturer                    | country |
|--------------------------------------------|---------------|----------------|---------------------------------|---------|
| Glycyrrhizin                               |               | 50531          | Sigma                           | USA     |
| Ficoll-Hypaque Solution                    |               | LTS1092P<br>K  | TBD Science                     | China   |
| Intranuclear fixation and permeabilization |               | 00-5523        | eBioscience                     | USA     |
| Cell stimulation cocktail                  |               | 00-4975        | eBioscience                     | USA     |
| Fixation and permeabilization kit          |               | 88-8824-0<br>0 | eBioscience                     | USA     |
| Phosphatase inhibitor cocktail             |               | S1873          | Beyotime                        | China   |
| Enhanced BCA Protein Assay Kit             |               | P0010          | Beyotime                        | China   |
| RevertAid First Strand cDNA Synthesis Kit  |               | K1622          | Thermo Scientific               | USA     |
| SYBR® Premix Ex Taq™ II                    |               | RR82LR         | Takara                          | Japan   |
| Total RNA Kit                              |               | DP419          | TIANGEN<br>Biotech              | China   |
| CD4-PE-Cy7                                 |               | 25-0042-8<br>2 | eBioscience                     | USA     |
| CD25-FITC                                  |               | 553071         | BD                              | USA     |
| Foxp3-PE                                   |               | 12-4771        | eBioscience                     | USA     |
| IL-17A-PE                                  |               | 12-7177-8<br>1 | eBioscience                     | USA     |
| Rabbit anti-HMGB1                          | 1:200         | BA4277         | Wuhan Boster<br>Bio-engineering | China   |
| Rabbit anti-Foxp3                          | 1:500         | 22173-1-A<br>P | Proteintech Group               | China   |
| Rabbit anti-TLR4                           | 1:500         | Ab13556        | Abcam                           | UK      |
| Rabbit anti-RORγt                          | 1:1000        | Ab78007        | Abcam                           | UK      |

|                       |        |                 |                                 |       |
|-----------------------|--------|-----------------|---------------------------------|-------|
| Rabbit anti-IL-2      | 1:800  | BS60299         | Bioworld                        | USA   |
| Rabbit anti-IL-6      | 1:800  | BS6419          | Bioworld                        | USA   |
| Rabbit anti-STAT3     | 1:1000 | 9139            | Cell Signaling                  | USA   |
| Rabbit anti-p-STAT3   | 1:2000 | 9145P           | Cell Signaling                  | USA   |
| Rabbit anti-STAT5     | 1:1000 | Ab68465         | Abcam                           | UK    |
| Rabbit anti-p-STAT5   | 1:1000 | Ab32364         | Abcam                           | UK    |
| anti- $\beta$ -action | 1:200  | BM0624          | Wuhan Boster<br>Bio-engineering | China |
| HMGB1 ELISA kit       |        | E-EL-M06<br>76c | Elabscience<br>Biotechnology    | China |
| IL-17A ELISA kit      |        | EMC008          | NeoBioscience                   | China |
| IL-10 ELISA kit       |        | EMC005          | NeoBioscience                   | China |
| IL-2 ELISA kit        |        | EMC002          | NeoBioscience                   | China |
| IL-6 ELISA kit        |        | EMC004          | NeoBioscience                   | China |

**Table S2. Sequences of primers for qRT-PCR.**

| Molecular              | sequence(5'-3')                |
|------------------------|--------------------------------|
| HMGB1 forward          | 5' CCAAAGCGATAGGAAACTGC 3'     |
| HMGB1 reverse          | 5' AACATAAGTGCCCTCGTG 3'       |
| Foxp3 forward          | 5' TGGAACACGGGCACTATCACA 3'    |
| Foxp3 reverse          | 5' GAGGCTGCGTATGATCAGTTATGC 3' |
| ROR $\gamma$ t forward | 5' TGCAAGACTCATCGACAAGG 3'     |
| ROR $\gamma$ t reverse | 5' AGGGGATTCAACATCAGTGC 3'     |
| IL-2 forward           | 5' TCTGGTCTTTGATGGGTTCTG 3'    |
| IL-2 reverse           | 5' GCAGGTGATGGTAGGTGGAA 3'     |
| IL-2R forward          | 5' AAAGGCAGGGAAATGAGGAT 3'     |
| IL-2R reverse          | 5' ATCTTGGTGATGGGCAGAAG 3'     |
| IL-6 forward           | 5' GAGGATACCACTCCCAACAGACC 3'  |
| IL-6 reverse           | 5' AAGTGCATCATCGTTGTTCATACA 3' |
| IL-6R forward          | 5' TAGTGGCAGGGAAAGTGGAA 3'     |
| IL-6R reverse          | 5' GGAGGGATGGGGAAAATAGA 3'     |
| STAT5 forward          | 5' GGAAGATGGGTTTTTGCTGA 3'     |
| STAT5 reverse          | 5' GGTTCTGATGCTGGGAGAGA 3'     |
| STAT3 forward          | 5' TCTCCTTCCTCCCTTCCTTC 3'     |
| STAT3 reverse          | 5' CCAGTCACCTCTGTCCCCTA 3'     |
| IL-10 forward          | 5' GACAACATACTGCTAACCGACTC 3'  |
| IL-10 reverse          | 5' TCACTCTTCACCTGCTCCACTG 3'   |

|                        |                                |
|------------------------|--------------------------------|
| IL-17A forward         | 5' TCTCTGATGCTGTTGCTGCT 3'     |
| IL-17A reverse         | 5' CGTGGAACGGTTGAGGTAGT 3'     |
| TGF- $\beta$ 1 forward | 5' TGACGTCACCTGGAGTTGTACGG 3'  |
| TGF- $\beta$ 1 reverse | 5' GGTTTCATGTCATGGATGGTGC 3'   |
| TLR4 forward           | 5'CTGGGAAGGGGGATAACATT 3'      |
| TLR4 reverse           | 5' CAGATAGTCGGAGGCTGTCAA 3'    |
| GADPH forward          | 5' AGCAATGCCTCCTGCACCACCAAC 3' |
| GADPH reverse          | 5' CCGGAGGGGGCCATCCACAGTCT 3'  |

---

**Table S3. Body weight and blood glucose levels in *Apoe*<sup>-/-</sup> mice.**

| Age (weeks) | physiological indicator | Control    | HFD                     | GLY                     |
|-------------|-------------------------|------------|-------------------------|-------------------------|
| 8           | Weight (g)              | 23.17±0.70 | 24.17±0.31              | 23.67±0.42              |
|             | Glucose (mmol/L)        | 4.42±0.14  | 4.58±0.19               | 4.28±0.14               |
|             | Food intake (g)         | 4.42±0.14  | 4.58±0.19               | 4.28±0.14               |
| 16          | Weight (g)              | 27.13±0.41 | 32.47±0.76 <sup>a</sup> | 31.62±0.62              |
|             | Glucose (mmol/L)        | 4.43±0.12  | 5.65±0.23 <sup>a</sup>  | 5.88±0.17               |
|             | Food intake (g)         | 3.65±0.15  | 3.25±0.22               | 3.33±0.14               |
| 24          | Weight (g)              | 28.62±0.34 | 36.72±0.69 <sup>a</sup> | 32.95±0.56 <sup>b</sup> |
|             | Glucose (mmol/L)        | 4.47±0.15  | 6.60±0.30 <sup>a</sup>  | 6.38±0.27               |
|             | Food intake (g)         | 3.53±0.18  | 3.21±0.14               | 3.23±0.13               |

Values are expressed as means ± SD.

HFD, high-fat diet group; GLY, glycyrrhizin treated group.

<sup>a</sup>*p* < 0.05, compared with Control group.

<sup>b</sup>*p* < 0.05, compared with HFD group.
