# Supplementary material
Source: publisher figshare collection journal article supplement (https://karger.figshare.com/articles/dataset/_/7593068)
Supplement: Supplementary file 1 [file 1 › 495310sm_2.pdf]

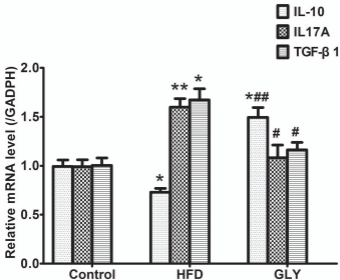

**Fig.S1. IL-10, IL-17A and TGF- $\beta$ 1 mRNA expression levels in the aortic tissues of *Apoe*<sup>-/-</sup> mice. n=5**  
per group. Data are the mean  $\pm$  SEM. \* $p$ <0.05 and \*\* $p$ <0.01 versus Control group. # $p$ <0.05 and ## $p$ <0.01  
versus HFD group.
